# Supplementary material for: Facile synthesis of single-crystalline MnO2nanowire arrays with high photothermal catalytic activity
Source: Royal Society of Chemistry journal article supplement (doi:10.1039/d2cc06241k), 2023-01-01
Supplement: d2cc06241k1.pdf [file d2cc06241k1.pdf]

## Supporting Information for

# Facile synthesis of single-crystalline MnO<sub>2</sub> nanowire arrays with high photothermal catalytic activity

Tetsuro Soejima,<sup>a, b\*</sup> Haruki Inoue,<sup>b</sup> Keigo Egashira,<sup>b</sup> Yaozong Yan<sup>b</sup> and Hiroaki Tada<sup>a, b\*</sup>

<sup>a</sup> Department of Applied Chemistry, Faculty of Science and Engineering, Kindai University, 3-4-1, Kowakae, Higashi-Osaka, Osaka 577-8502, Japan.

<sup>b</sup> Graduate School of Science and Engineering, Kindai University, 3-4-1, Kowakae, Higashi-Osaka, Osaka 577-8502, Japan.

E-mail: soejima@apch.kindai.ac.jp, h-tada@apch.kindai.ac.jp

## Table of Contents

|                                                                                                                                                                                                                                                                              |       |
|------------------------------------------------------------------------------------------------------------------------------------------------------------------------------------------------------------------------------------------------------------------------------|-------|
| <b>Materials</b> .....                                                                                                                                                                                                                                                       | 3     |
| <b>Growth of TiO<sub>2</sub> nanocorals on glass substrate</b> .....                                                                                                                                                                                                         | 3     |
| <b>Growth of <math>\gamma</math>-MnOOH and <math>\beta</math>-MnO<sub>2</sub> nanowire arrays on TiO<sub>2</sub> nanocorals</b> .....                                                                                                                                        | 4     |
| <b>Analysis of the prepared nanocrystals</b> .....                                                                                                                                                                                                                           | 4     |
| <b>Photothermal catalytic reaction</b> .....                                                                                                                                                                                                                                 | 4-5   |
| <b>Fig. S1.</b> SEM images of TiO <sub>2</sub> nanocoral substrates for the growth of $\gamma$ -MnOOH NWA .....                                                                                                                                                              | 6     |
| <b>Fig. S2.</b> Kubelka-Munk-transformed absorption spectrum of $\beta$ -MnO <sub>2</sub> NPs .....                                                                                                                                                                          | 7     |
| <b>Fig. S3.</b> TEM image (a) and particle size distribution (b) of $\beta$ -MnO <sub>2</sub> NPs. ....                                                                                                                                                                      | 8     |
| <b>Fig. S4.</b> A large scale HRTEM image of a $\gamma$ -MnOOH nanowire .....                                                                                                                                                                                                | 9     |
| <b>Fig. S5.</b> FT-IR spectra of (a) $\gamma$ -MnOOH and (b) $\beta$ -MnO <sub>2</sub> NWA .....                                                                                                                                                                             | 10    |
| <b>Fig. S6.</b> High-resolution (a) Mn 2p and (b) Mn 3s XPS spectra of (A) $\gamma$ -MnOOH and (B) $\beta$ -MnO <sub>2</sub> NW.....                                                                                                                                         | 11    |
| <b>Fig. S7.</b> SEM images of a film sample. TiO <sub>2</sub> nanocoral substrates were placed in an aqueous solution containing Mn(NO <sub>3</sub> ) <sub>2</sub> and H <sub>2</sub> O <sub>2</sub> at an angle against the wall of glass vials and were kept at 85 °C..... | 12    |
| <b>Fig. S8.</b> SEM images of $\gamma$ -MnOOH NWA obtained at various reaction temperatures; (a) 40 °C, (b) 50 °C, (c) 60 °C, (d) 70 °C, (e) 80 °C, (f) 90 °C.....                                                                                                           | 13-14 |
| <b>Fig. S9.</b> XRD patterns of $\gamma$ -MnOOH NWA obtained at various reaction temperatures; (a) 40 °C, (b) 50 °C, (c) 60 °C, (d) 70 °C, (e) 80 °C, (f) 90 °C.....                                                                                                         | 15    |

|                                                                                                                                                                                                                                                            |    |
|------------------------------------------------------------------------------------------------------------------------------------------------------------------------------------------------------------------------------------------------------------|----|
| <b>Fig. S10.</b> Time-course changes in pH on the growth solutions of $\gamma$ -MnOOH NWA with or without $\text{Mn}(\text{NO}_3)_2$ .....                                                                                                                 | 16 |
| <b>Fig. S11.</b> XRD pattern of the as-prepared film sample. $\text{TiO}_2$ nanocoral substrates were placed in an aqueous solution containing $\text{Mn}(\text{NO}_3)_2$ and HMT at an angle against the wall of glass vials and were kept at 85 °C ..... | 17 |
| <b>Fig. S12.</b> Temperature change in the bulk reaction solution during the photothermal reaction in the $\beta$ - $\text{MnO}_2$ NWA and $\beta$ - $\text{MnO}_2$ NP catalyst systems. ....                                                              | 18 |
| <b>Fig. S13.</b> Repeated photothermal reaction in the $\beta$ - $\text{MnO}_2$ NWA catalyst system. ....                                                                                                                                                  | 19 |
| <b>Fig. S14.</b> SEM image of the $\beta$ - $\text{MnO}_2$ NWA catalyst used after the repeated photothermal reaction. ....                                                                                                                                | 20 |
| <b>Fig. S15.</b> XP spectrum of the $\beta$ - $\text{MnO}_2$ NWA catalyst used after the repeated photothermal reaction. ....                                                                                                                              | 21 |

## Materials.

All aqueous solutions were prepared with distilled water. Glass slides (18 mm × 32 mm × 0.13-0.17 mm) as the substrate to grow TiO<sub>2</sub> nanocorals and MnOOH and MnO<sub>2</sub> nanowire arrays (NWA) were purchased from Matsunami Glass Ind., Ltd. Acetonitrile, phenazine-2,3-diamine, and hydrochloric acid (HCl) were purchased from FUJIFILM Wako Pure Chemical Corporation. Hydrogen peroxide for the photothermal catalytic reaction, sodium carbonate (Na<sub>2</sub>CO<sub>3</sub>), and hexamethylenetetramine (HMT) were purchased from KISHIDA CHEMICAL Co.,Ltd. Manganese(II) nitrate hexahydrate (Mn(NO<sub>3</sub>)<sub>2</sub>·6H<sub>2</sub>O) and β-MnO<sub>2</sub> nanoparticles were purchased from KANTO CHEMICAL CO.,INC. *o*-Phenylenediamine and hydrogen peroxide (35%, H<sub>2</sub>O<sub>2</sub>) for the syntheses of TiO<sub>2</sub> and manganese oxide nanostructures were purchased from Tokyo Chemical Industry Co., Ltd. Titanium(IV) oxysulfate hydrate (TiOSO<sub>4</sub>·*n*H<sub>2</sub>O, *n* ~ 5) was purchased from NACALAI TESQUE, INC.

## Growth of TiO<sub>2</sub> nanocorals on glass substrate

71.25 mg of TiOSO<sub>4</sub>·*n*H<sub>2</sub>O and 60 μL of 35% H<sub>2</sub>O<sub>2</sub> aqueous solution were added to 19 mL of water, and then the pH was adjusted to 1.30 with the addition of concentrated HCl. After TiOSO<sub>4</sub> was completely dissolved, 42.0 mg of Na<sub>2</sub>CO<sub>3</sub> was added to the aqueous solution of TiOSO<sub>4</sub>-H<sub>2</sub>O<sub>2</sub>. The obtained aqueous solution was poured in glass vials with polypropylene screw caps. A glass slide was immersed and placed against the inside wall. The sample was heated at 80 °C for 15 h in a constant-temperature drying oven. The obtained thin films were washed with water, and dried in air at room temperature. The as-prepared film was calcined at 400 °C for 2 h in an electric furnace to improve adhesion between TiO<sub>2</sub> nanocorals and the glass substrate. The TiO<sub>2</sub> nanocoral consists of a rutile overlayer with 400-500 nm thickness and an anatase underlayer with 50-100 nm thickness.

### **Growth of $\gamma$ -MnOOH and $\beta$ -MnO<sub>2</sub> nanowire arrays on TiO<sub>2</sub> nanocorals**

45  $\mu$ L of Mn(NO<sub>3</sub>)<sub>2</sub>·6H<sub>2</sub>O and 60  $\mu$ L of H<sub>2</sub>O<sub>2</sub> aqueous solution were added to 19 mL of water, and then 0.04 g of HMT was added to the aqueous solution of Mn(NO<sub>3</sub>)<sub>2</sub>–H<sub>2</sub>O<sub>2</sub>. The obtained aqueous solution was poured in a glass vial with a polypropylene screw cap after HMT has been dissolved. A substrate was immersed and placed against the inside wall. The sample was heated at 85 °C for 5 h. The obtained thin film was washed with water and dried in air at room temperature. The as-prepared film was calcined at 400 °C for 2 h in an electric furnace to convert the as-grown  $\gamma$ -MnOOH into  $\beta$ -MnO<sub>2</sub>.

### **Analysis of the prepared nanocrystals**

X-ray diffraction (XRD) was performed using a Shimadzu XD-D1. Field-emission scanning electron microscopy (SEM) was performed using a Hitachi S-5000 and a Hitachi S-4800 type II. UV-vis-near infrared diffuse reflectance spectra were measured using a JASCO V-670 UV-Vis spectrophotometer with an integrating sphere. X-ray photoelectron spectroscopy (XPS) was performed using a Shimadzu KRATOS-AXIS Nova spectrometer (X-ray source operated at 15 kV) and a ULVAC-PHI VersaProbe 4 (X-ray source operated at 15 kV). The observed sample was sputtered using Pt-Pd alloy before SEM observation. The measured binding energies by the XPS were referenced to the C 1s line at 284.6 eV. TEM observations were performed using a JEOL JEM-4000EX (acceleration voltage, 400 kV). The photoluminescence (PL) spectra were collected by means of a JASCO FP-6000 spectrofluorometer with varying excitation wavelengths at -196°C.

### **Catalytic and photothermal catalytic reactions**

The oxidative coupling of OPD to DAP was carried out using a double jacket-type reaction cell in the dark and under illumination of simulated sunlight (PEC-L12-S17, Peccell technologies, Inc.) (AM 1.5 one sun,  $\lambda > 660$  nm). The light intensity at the place of the reaction cell was adjusted to  $100 \text{ mW cm}^{-2}$ , and then the light was irradiated through an optical filter (AGC TECHNO GLASS Co., R-68). A  $\text{H}_2\text{O}$ -acetonitrile solution (20 mL, 9 : 1 v/v) of 5 mM *o*-phenylenediamine (OPD) with or without  $\text{H}_2\text{O}_2$  (10 mM) was placed in the reaction cell, and then,  $\beta\text{-MnO}_2$  NWA-grown glass substrate ( $2 \text{ cm} \times 2.5 \text{ cm}$ ) was immersed into the solution. For comparison, commercial  $\beta\text{-MnO}_2$  NPs (Kanto Chemicals) were used as the catalyst in the place of  $\beta\text{-MnO}_2$  NWA. In this case, the amounts of  $\text{MnO}_2$  contained in both the systems were made the same (1.5 mg). At a given time, an aliquot of the reaction solution was taken to be diluted ten times with water. The concentration of 2,3-diaminophenazine (DAP) was determined by the absorption intensity at 420 nm by using a UV-vis spectrophotometer (Shimadzu Corporation, UV-1800).

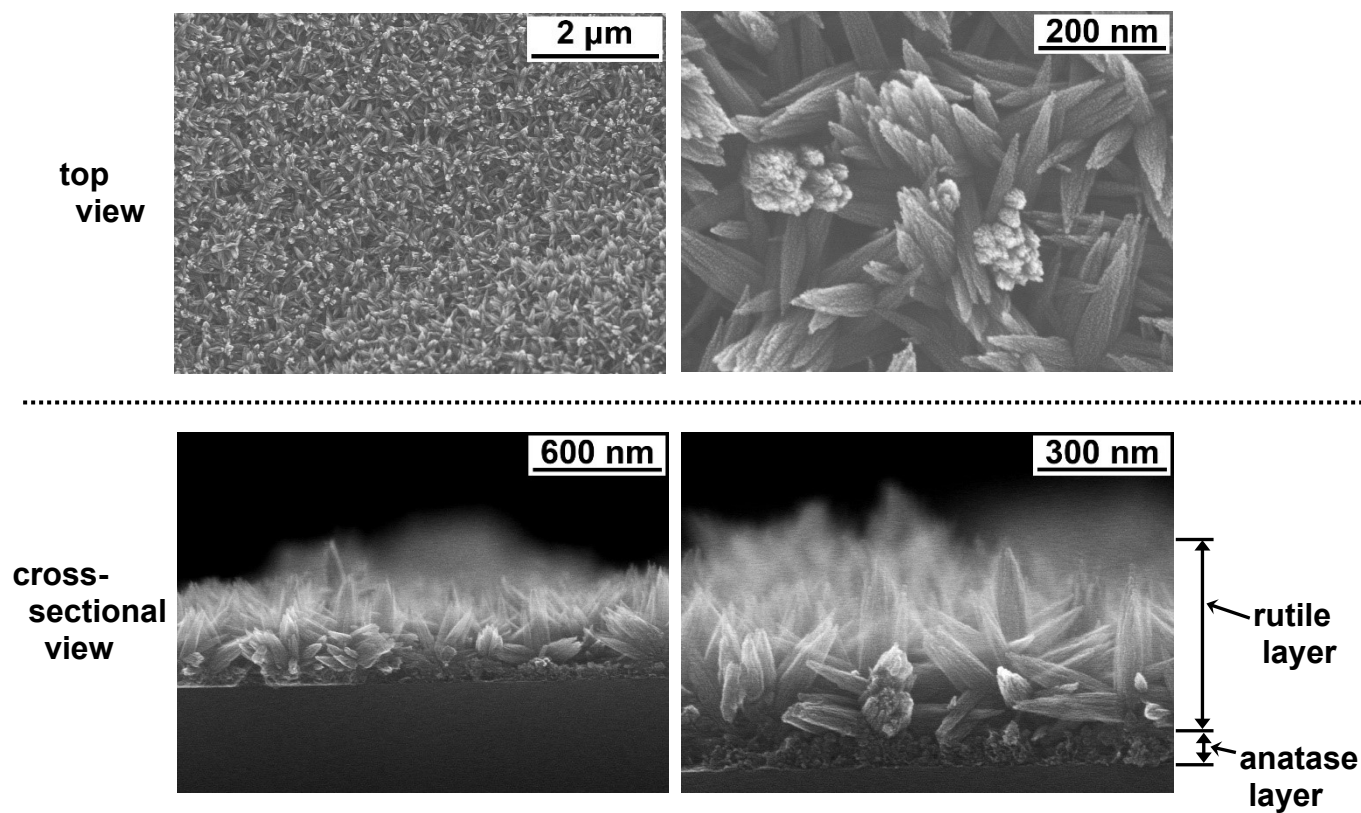

**Fig. S1.** SEM images of  $\text{TiO}_2$  nanocoral substrates for the growth of  $\gamma\text{-MnOOH}$  NWA.  $\text{TiO}_2$  nanocorals consist of anatase base film and rutile nanocoral layer.

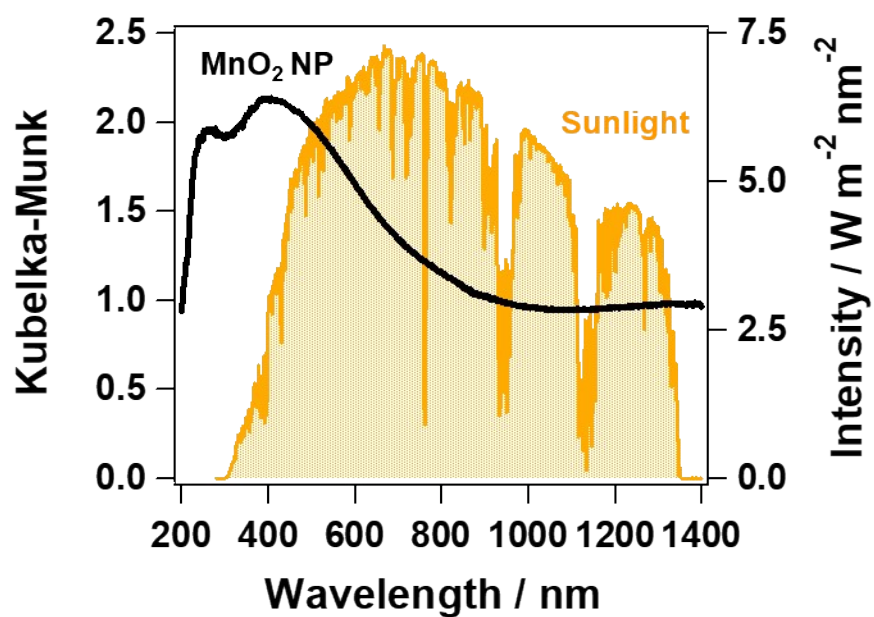

**Fig. S2.** Kubelka-Munk-transformed absorption spectrum of  $\beta$ -MnO<sub>2</sub> NPs, and the solar spectrum for comparison. Diffuse reflectance spectrum of  $\beta$ -MnO<sub>2</sub> NPs was measured by diluting them to 30% with BaSO<sub>4</sub>.

(a)

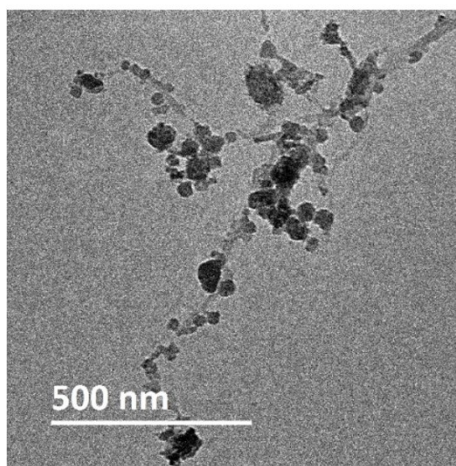

(b)

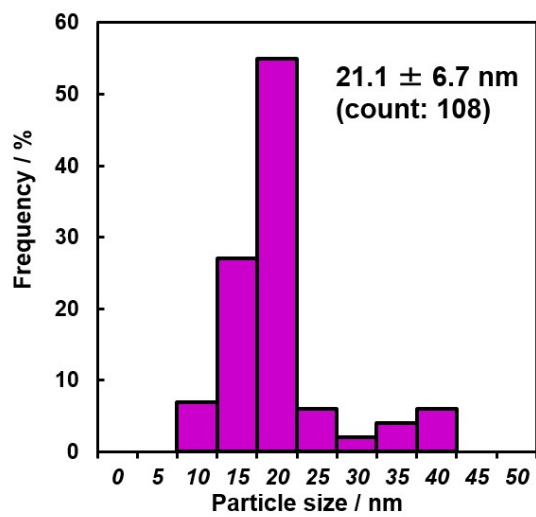

**Fig. S3.** TEM image (a) and particle size distribution (b) of  $\beta$ -MnO<sub>2</sub> NPs.



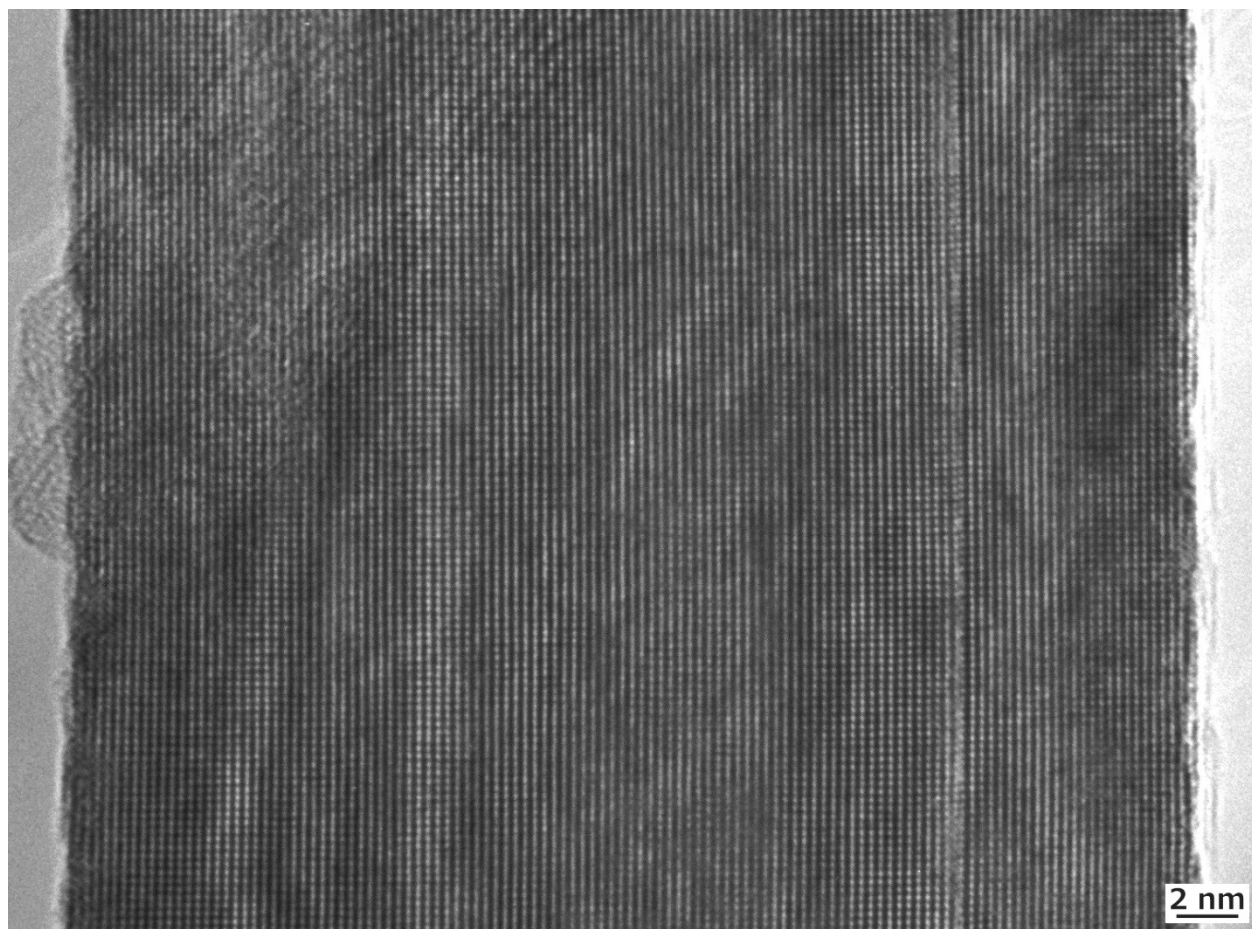

**Fig. S4.** A large scale HRTEM image of a  $\gamma$ -MnOOH nanowire.

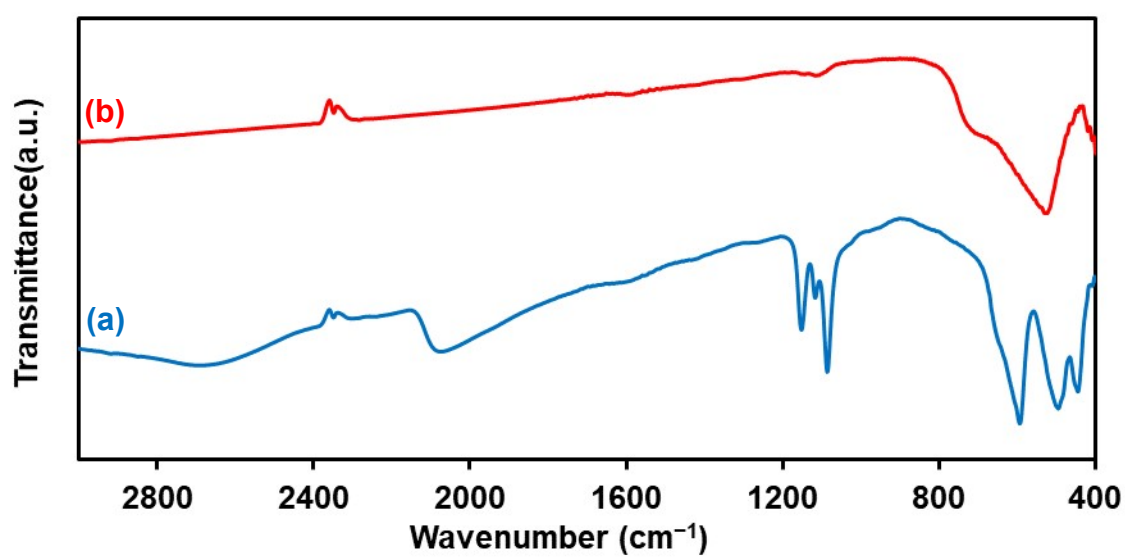

**Fig. S5.** FT-IR spectra of (a)  $\gamma$ -MnOOH and (b)  $\beta$ -MnO<sub>2</sub> NWA.

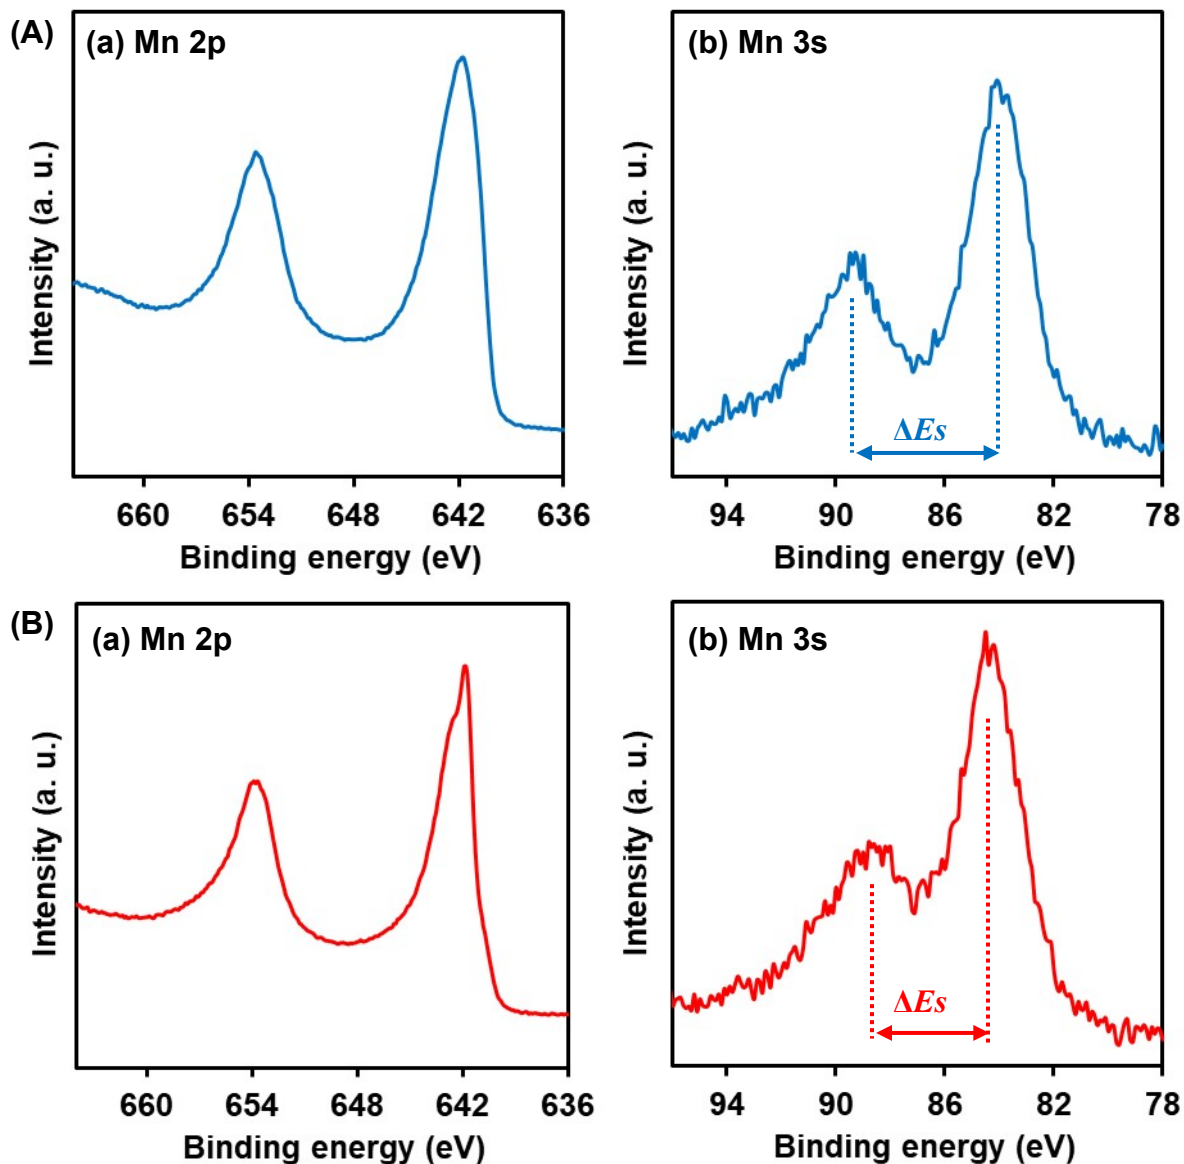

**Fig. S6.** High-resolution (a) Mn 2p and (b) Mn 3s XPS spectra of (A)  $\gamma$ -MnOOH and (B)  $\beta$ -MnO<sub>2</sub> NWA. The average oxidation state (AOS) of manganese was calculated by using the magnitude of Mn3s multiplet splitting ( $\Delta E_s$ ), according to the following relationship;

$$\text{AOS} = 8.95 - 1.13\Delta E_s$$

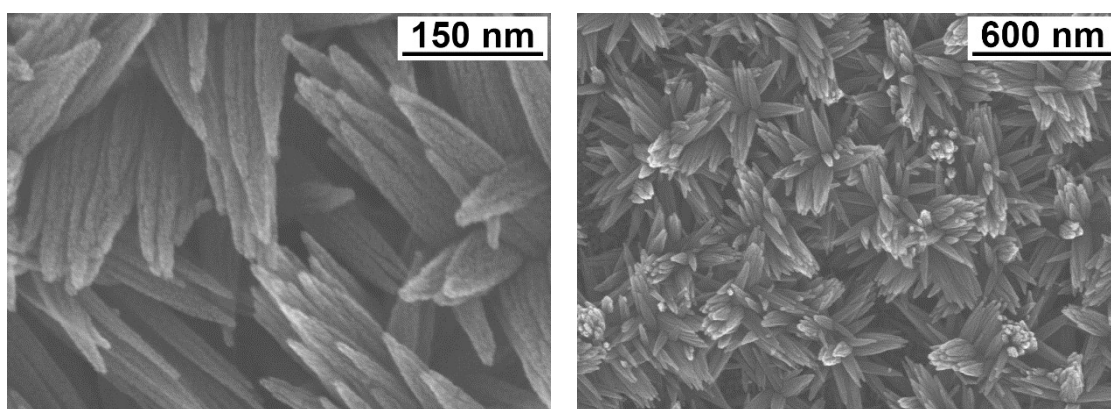

**Fig. S7.** SEM images of a film sample.  $\text{TiO}_2$  nanocoral substrates were placed in an aqueous solution containing  $\text{Mn}(\text{NO}_3)_2$  and  $\text{H}_2\text{O}_2$  at an angle against the wall of glass vials and were kept at 85 °C.

(a) 40 °C

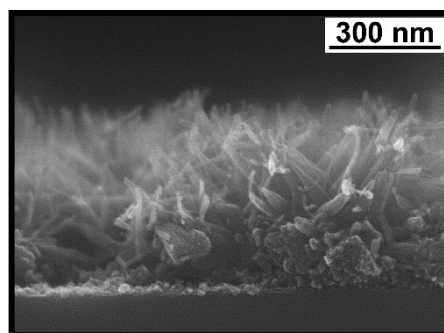

(b) 50 °C

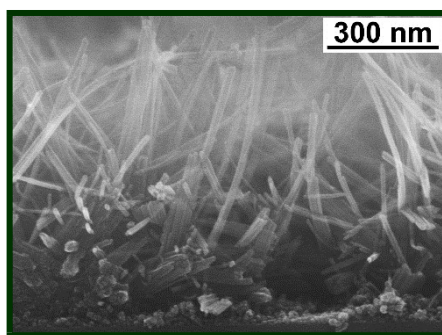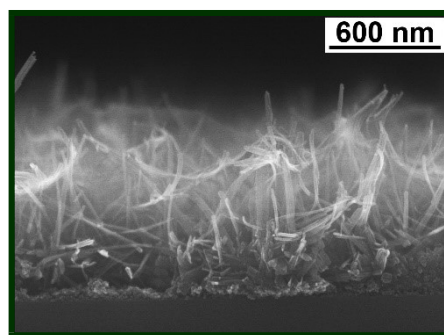

(c) 60 °C

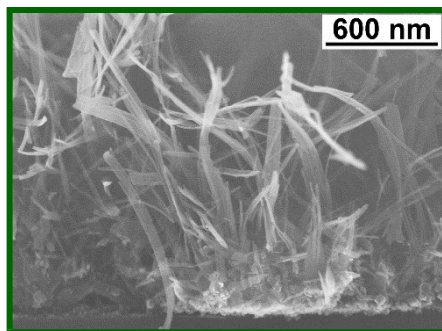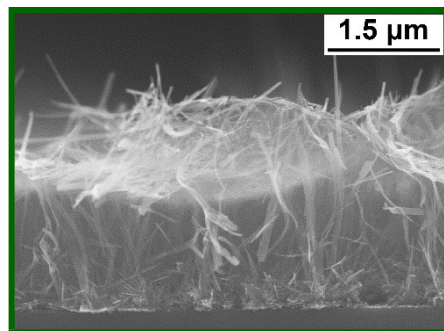

(d) 70 °C

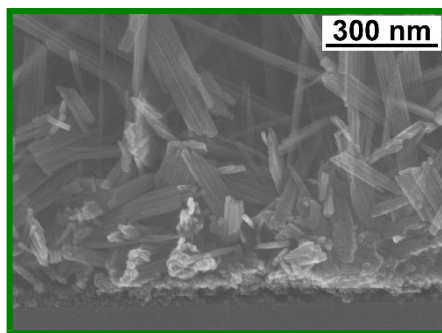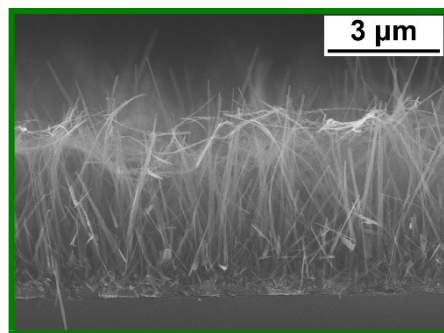

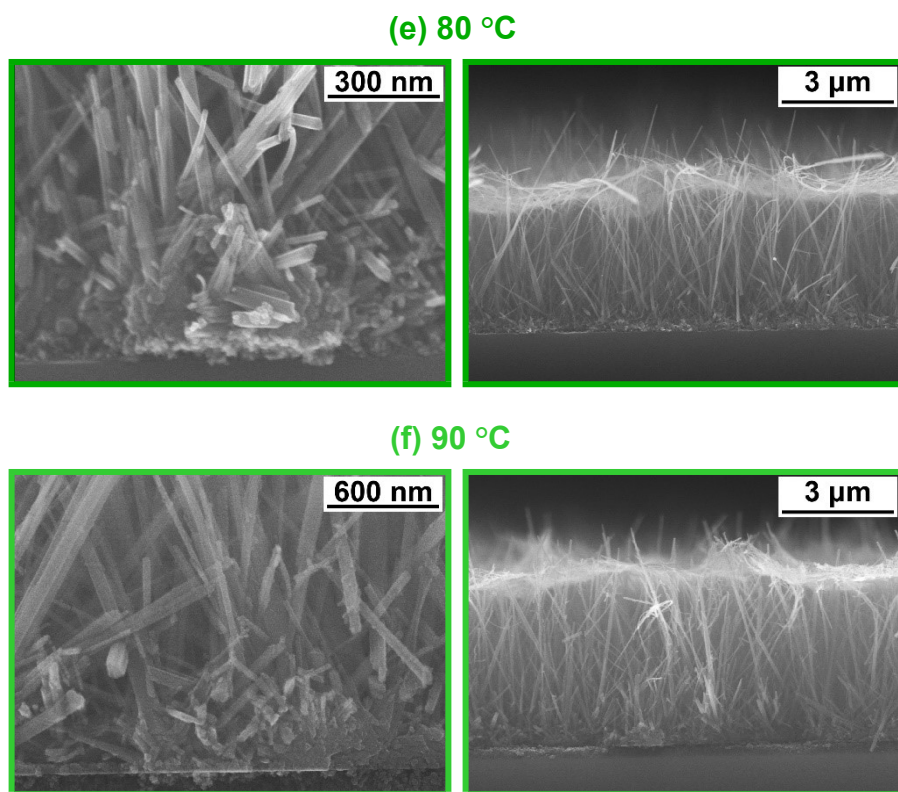

**Fig. S8.** SEM images of  $\gamma$ -MnOOH NWA obtained at various reaction temperatures; (a) 40 °C, (b) 50 °C, (c) 60 °C, (d) 70 °C, (e) 80 °C, (f) 90 °C.

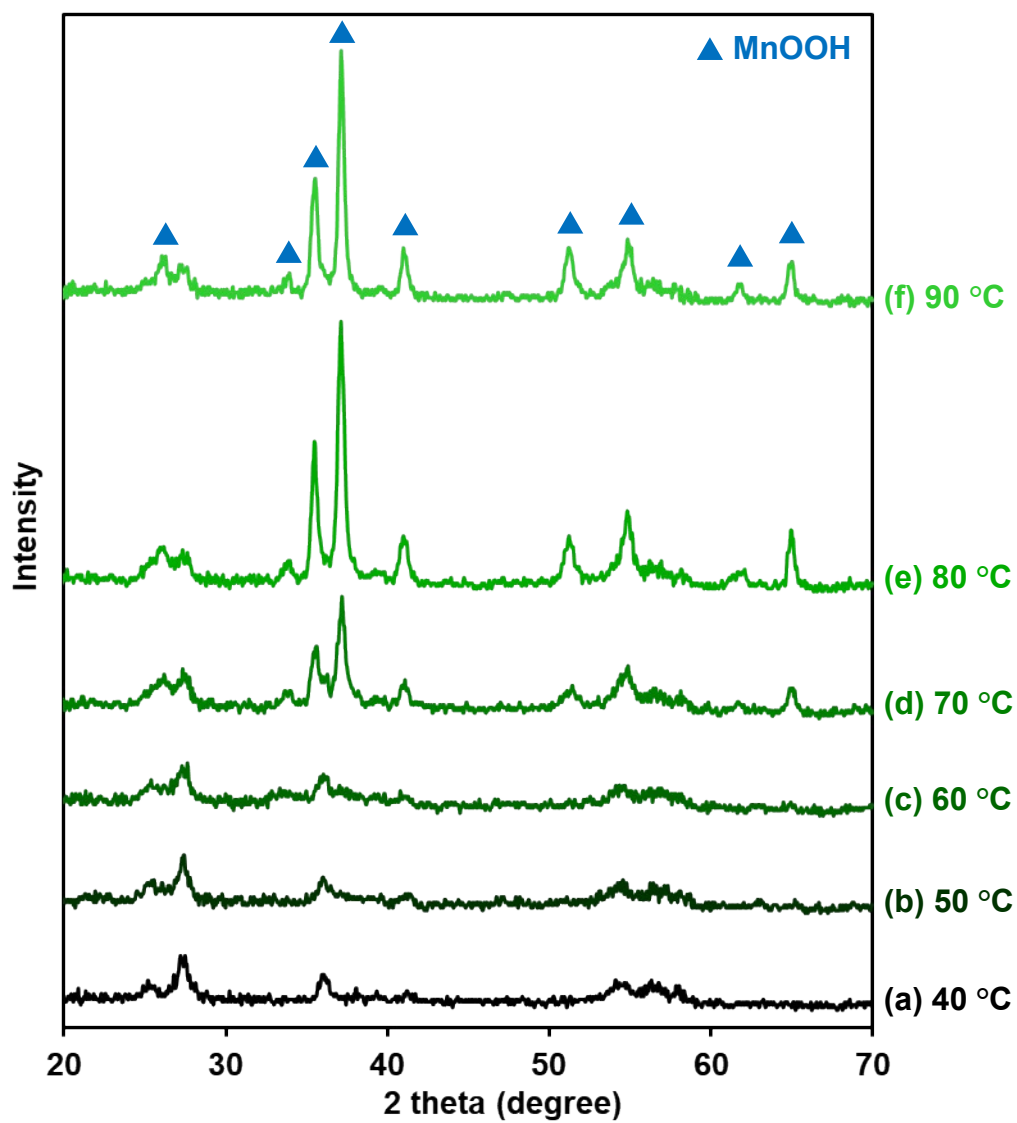

**Fig. S9.** XRD patterns of  $\gamma$ -MnOOH NWA obtained at various reaction temperatures; (a) 40 °C, (b) 50 °C, (c) 60 °C, (d) 70 °C, (e) 80 °C, (f) 90 °C.

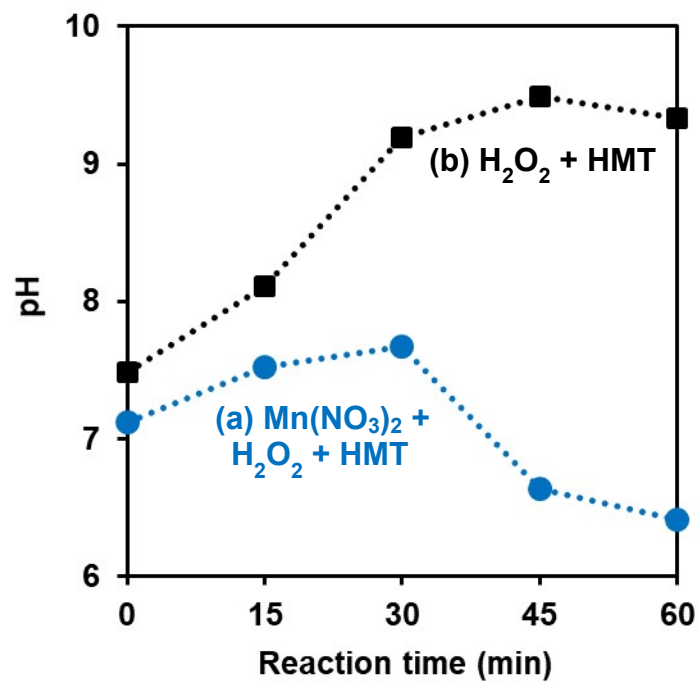

**Fig. S10.** Time-course changes in pH on the growth solutions of  $\gamma$ -MnOOH NWA with or without Mn(NO<sub>3</sub>)<sub>2</sub>.



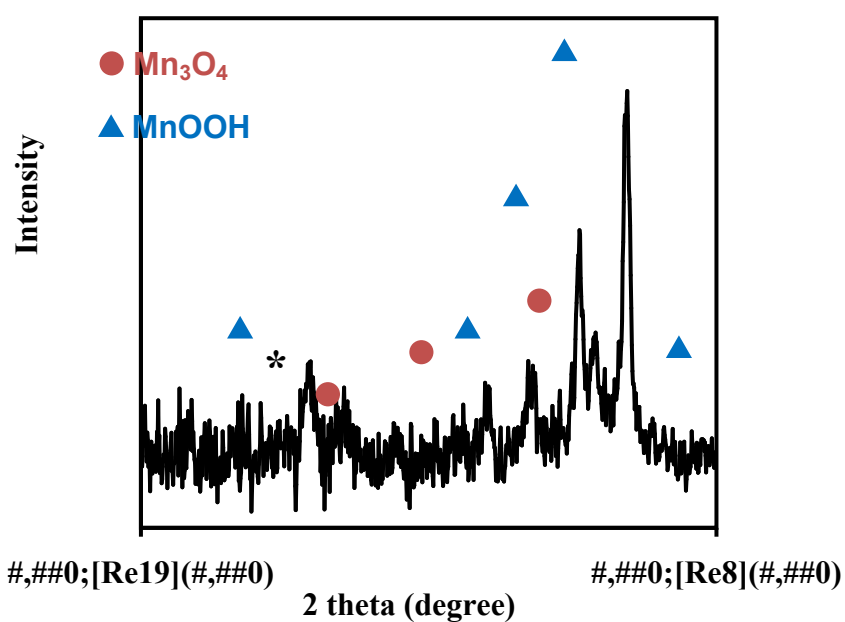

**Fig. S11.** XRD pattern of the as-prepared film sample.  $\text{TiO}_2$  nanocoral substrates were placed in an aqueous solution containing  $\text{Mn}(\text{NO}_3)_2$  and HMT at an angle against the wall of glass vials and were kept at 85 °C.

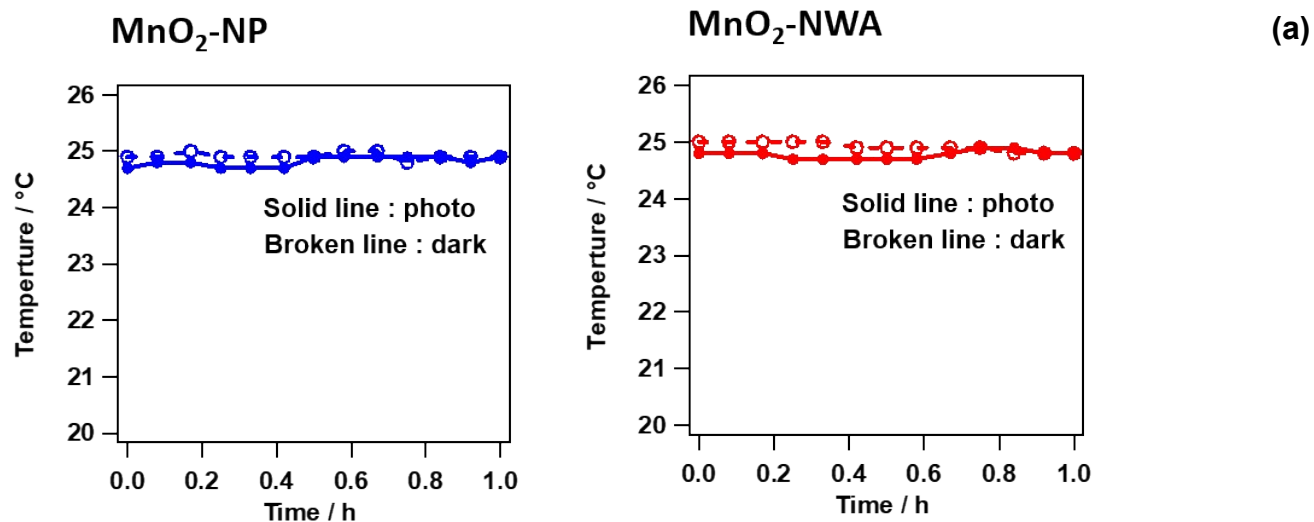

**S12.** Temperature change in the bulk reaction solution during the photothermal reaction in the  $\beta$ -MnO<sub>2</sub> NP and  $\beta$ -MnO<sub>2</sub> NWA catalyst systems. The temperature was directly measured by thermometer while taking care to avoid its direct light exposure.

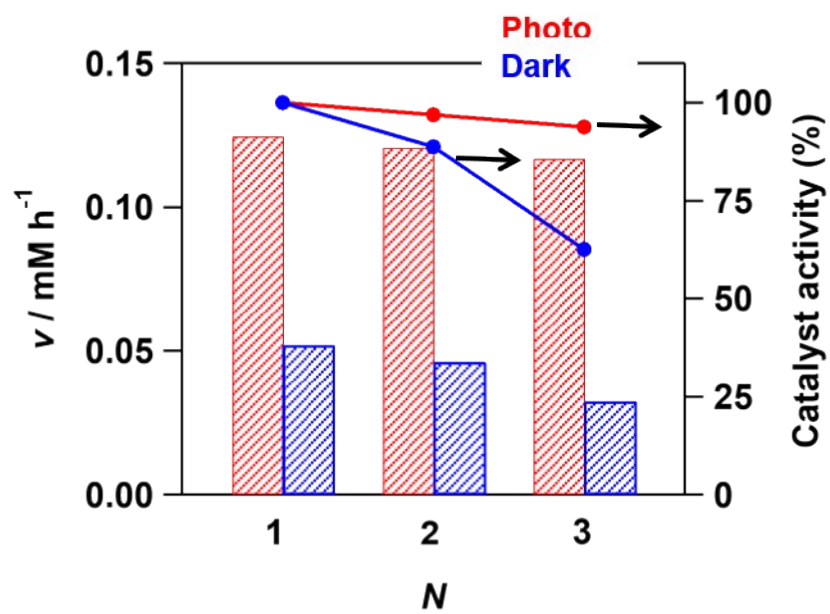

**Fig. S13.** Stability of  $\beta\text{-MnO}_2$  NWA during the repeated dark (blue) and photothermal (red) reactions.  $N$  denotes the repetition number of the reaction.

**(a) photo**

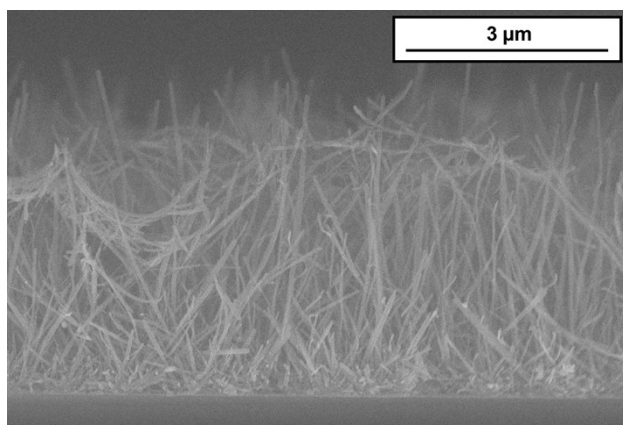

**(b) dark**

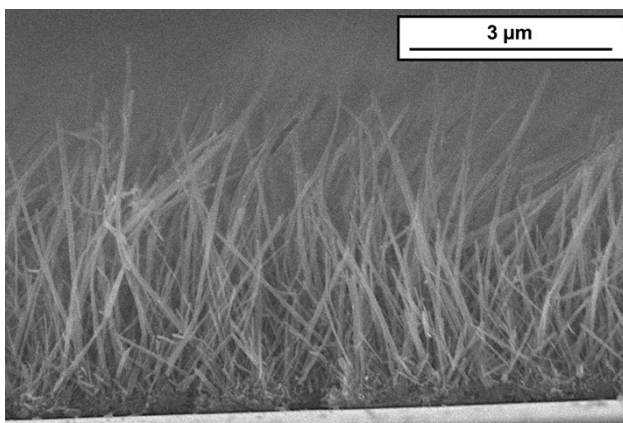

**Fig. S14.** SEM image of the  $\beta$ -MnO<sub>2</sub> NWA catalyst used after the repeated photothermal reaction.

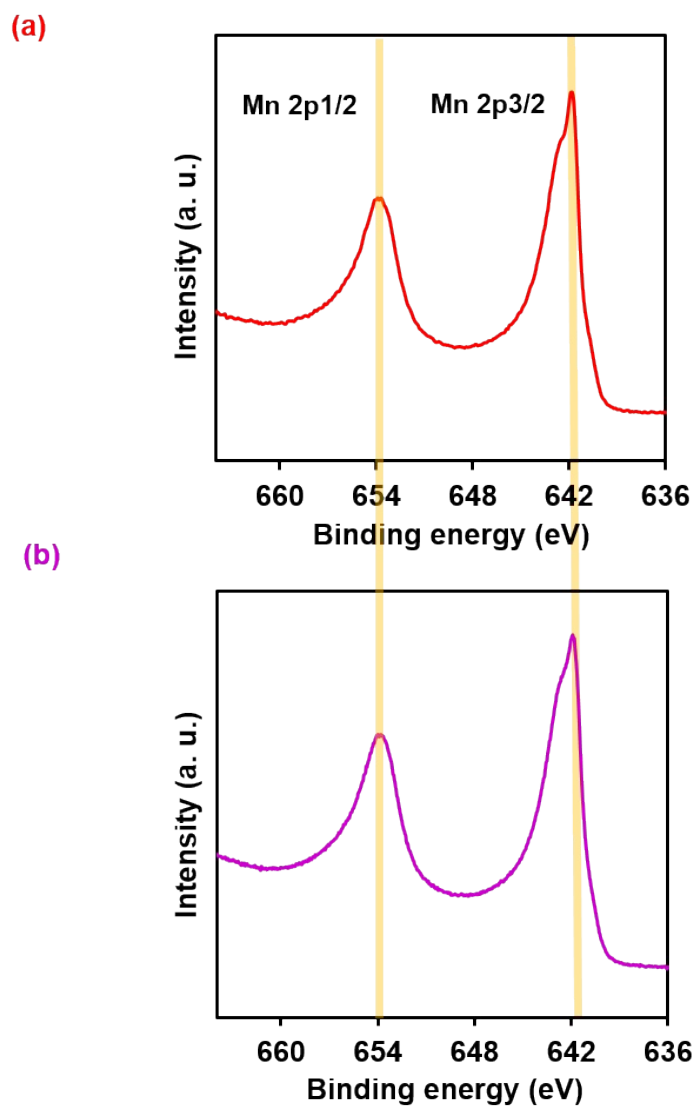

**Fig. S15.** Mn 2p XPS spectra of the  $\beta$ -MnO<sub>2</sub> NWA catalyst used (a) before and (b) after the repeated photothermal reaction.
